# Supplementary material for: A Rigidifying Salt-Bridge Favors the Activity of Thermophilic Enzyme at High Temperatures at the Expense of Low-Temperature Activity
Source: PubMed Central journal article supplement (PMC3057955; doi:10.1371/journal.pbio.1001027), 2011-03-15
Supplement: pbio.1001027.s006.pdf [file pbio.1001027.s006.pdf]

**Table S1. Structure determination of acylphosphatase variants - crystallization, data collection and refinement statistics.**

|                                                                                                 | PhG91A                                   | HuA99                                                  | HuG99                                         |
|-------------------------------------------------------------------------------------------------|------------------------------------------|--------------------------------------------------------|-----------------------------------------------|
| Crystallization conditions                                                                      | 0.6M Na/K Phosphate, pH8.5, 25% glycerol | 0.1M Bis-Tris, 0.1M Sodium acetate, pH6.0, 25% PEG3350 | 2.4M Sodium malonate, pH7.0                   |
| <b>Diffraction data collection (Values in parenthesis are for the highest-resolution shell)</b> |                                          |                                                        |                                               |
| X- ray source                                                                                   | Cu K $\alpha$                            | Cu K $\alpha$                                          | Cu K $\alpha$                                 |
| Space group                                                                                     | P2 <sub>1</sub> 2 <sub>1</sub> 2         | P2 <sub>1</sub> 2 <sub>1</sub> 2 <sub>1</sub>          | P2 <sub>1</sub> 2 <sub>1</sub> 2 <sub>1</sub> |
| Resolution (Å)                                                                                  | 44.18- 2.40 (2.49- 2.40)                 | 14.31- 1.52 (1.60-1.52)                                | 41.03- 1.70 (1.79-1.70)                       |
| Unit cell dimension (Å)                                                                         | a=46.046; b=87.39; c= 153.60             | a=24.604; b=57.861; c=59.095                           | a=24.206; b=57.339; c=58.777                  |
| Multiplicity                                                                                    | 2.92 (2.74)                              | 6.7 (6.5)                                              | 6.5 (6.3)                                     |
| Completeness (%)                                                                                | 98.9 (97.5)                              | 99.9 (100.1)                                           | 99.9 (99.5)                                   |
| Mean $I/\sigma(I)$                                                                              | 10.7 (4.2)                               | 30.7 (9.2)                                             | 21.3 (4.4)                                    |
| $R_{merge}^a$                                                                                   | 0.070 (0.199)                            | 0.039 (0.184)                                          | 0.078 (0.338)                                 |
| Unique reflections                                                                              | 24753                                    | 9045                                                   | 12894                                         |
| <b>Structural Refinement</b>                                                                    |                                          |                                                        |                                               |
| $R_{cryst}/R_{free}^b$ (%)                                                                      | 22.7/ 25.2                               | 19.6/ 22.8                                             | 18.7/ 24.1                                    |
| <b>Model</b>                                                                                    |                                          |                                                        |                                               |
| No. of protein molecules                                                                        | 6                                        | 1                                                      | 1                                             |
| Protein atoms                                                                                   | 4308                                     | 765                                                    | 768                                           |
| Heterogen atoms                                                                                 | 41                                       | 0                                                      | 0                                             |
| Water atoms                                                                                     | 125                                      | 107                                                    | 85                                            |
| <b>RMS deviation from ideal values</b>                                                          |                                          |                                                        |                                               |
| Bond distance (Å)                                                                               | 0.007                                    | 0.012                                                  | 0.016                                         |
| Bond angles (deg.)                                                                              | 1.50                                     | 1.35                                                   | 1.55                                          |
| <b>Ramachandran analysis using MOLPROBITY</b>                                                   |                                          |                                                        |                                               |
| Favored region (%)                                                                              | 99.8                                     | 97.8                                                   | 98.9                                          |
| Other allowed region (%)                                                                        | 0.2                                      | 2.2                                                    | 1.1                                           |
| Outlier (%)                                                                                     | 0                                        | 0                                                      | 0                                             |

$$^a R_{merge} = \frac{\sum_{hkl} \sum_n |I(hkl)_n - \langle I(hkl)_n \rangle|}{\sum_{hkl} \sum_n I(hkl)_n}$$

$$^b R_{cryst} = \frac{\sum ||F_o| - |F_c||}{\sum |F_o|}, \text{ where } |F_o| \text{ and } |F_c| \text{ are the observed and calculated amplitudes, respectively. The}$$

free set contains 5% of the total reflections.
